# Supplementary material for: Spatial cellular robot in orbital truss collision-free path planning
Source: Copernicus journal article supplement (doi:10.5194/ms-11-233-2020), 2020-07-06
Supplement: Supplementary file 1 [file ms-11-233-2020-supplement.zip]

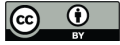

## *Supplement of*

# **Spatial cellular robot in orbital truss collision-free path planning**

**Ye Dai et al.**

*Correspondence to:* Ye Dai (daiye312@163.com)

- ms-11-233-2020-supplement-title-page.pdf
- supplement
  - Code
    - \* Improved algorithm iteration.fig
    - \* Path planning code.m
    - \* Space model.fig
    - \* Traditional algorithm iteration.fig
    - \* Truss path planning.fig

The copyright of individual parts of the supplement might differ from the CC BY 4.0 License.
